# Supplementary material
Source: publisher figshare collection journal article supplement (https://acs.figshare.com/ndownloader/files/4519942)
Supplement: Supplementary file 1 [file 4519942]

## SUPPORTING INFORMATION

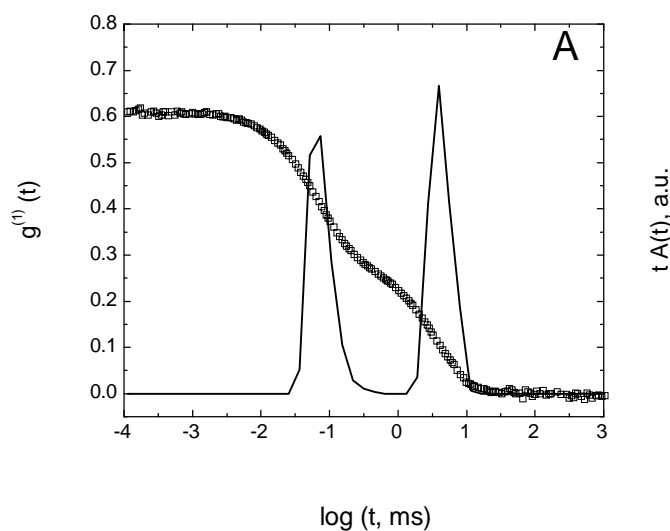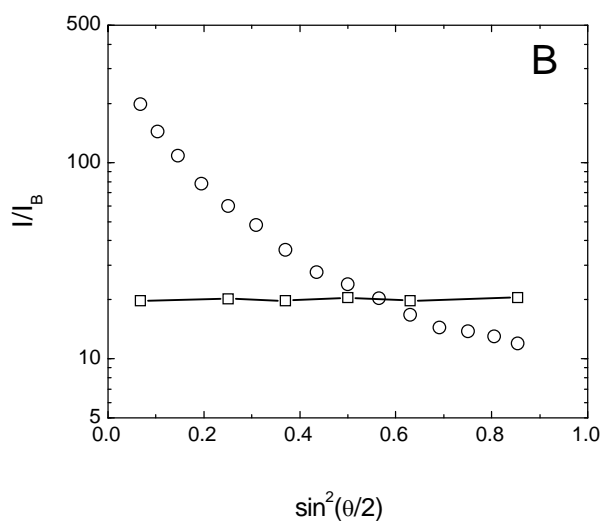

Details of light scattering data after a temperature treatment cycle  $T = 25^\circ\text{C} \rightarrow 80^\circ\text{C} \rightarrow 25^\circ\text{C}$ .

PMA in 20mM HCl. (A) DLS data showing the presence of some small traces of aggregates persisting weeks after the heating cycle. Spectrum of relaxation times corresponds to an intensity size distribution. (B) SLS data in the format of a Guinier plot showing angular dependencies of contributions from the regular scattering ( $\square$ ) and aggregates ( $\circ$ ). A pronounced slope and curvature indicates the presence of large and polydisperse aggregates.
